# Supplementary material for: Effects of Culinary Procedures on Concentrations and Bioaccessibility of Cu, Zn, and As in Different Food Ingredients
Source: MDPI journal article supplement (doi:10.3390/foods12081653), 2023-04-15
Supplement: s1 [file s1]

**Supplementary Material for**  
**Effects of culinary procedures on concentrations and bioaccessibility**  
**of Cu, Zn,**  
**and As in different food ingredients**

**Subcellular distribution of Cu, Zn, and As**

The fresh food ingredients were frozen and ground into a power in liquid nitrogen. Approximately 1 g of food ingredient power were homogenized in 10 mL of 20 mM Tris–NaCl buffer (pH = 8.0, 5 mM antioxidant 2-mercaptoethanol, and 0.1 mM freshly prepared antiprotease phenylmethylsulfonyl fluoride). The homogenate was first centrifuged at 1500  $\times g$  at 4°C for 15 min. The separated pellets were digested in 4 mL of 1 N NaOH at 80°C for 10 min and then centrifuged at 5000  $\times g$  for 10 min. The secondary pellet was metal-rich granules (MRG) and the supernatant was cellular debris (CD). The supernatant from the first centrifugation was further centrifuged at 100,000  $\times g$  at 4°C for 1 h. The pellet from this step was the organelles, and the supernatant was the cytosolic proteins. After heat treatment at 80°C for 10 minutes, the cytosolic proteins were cooled down in an ice bath for 30 minutes and then centrifuged at 50,000  $\times g$  at 4°C for 30 minutes. The final pellets and supernatant were HDP and HSP fractions, respectively.

Table S1. The concentrations of Cu, Zn, and As in raw food ingredients

( $\mu\text{g g}^{-1}$  dry weight)

|               | Cu              | Zn               | As              |
|---------------|-----------------|------------------|-----------------|
| Pork          | $1.22 \pm 0.07$ | $50.1 \pm 0.39$  |                 |
| Beef          | $3.38 \pm 0.04$ | $192 \pm 10.8$   |                 |
| Chicken       | $1.08 \pm 0.05$ | $23.4 \pm 1.61$  |                 |
| Prawns        | $7.32 \pm 2.56$ | $62.5 \pm 1.44$  | $3.13 \pm 0.01$ |
| Squid         | $3.77 \pm 0.60$ | $70.3 \pm 6.32$  | $3.62 \pm 0.12$ |
| Grass carp    | $1.31 \pm 0.31$ | $13.7 \pm 1.12$  |                 |
| Sea bream     | $1.42 \pm 0.05$ | $13.6 \pm 1.04$  | $2.85 \pm 0.07$ |
| Oysters       | $104 \pm 29.3$  | $624 \pm 148$    | $12.0 \pm 0.37$ |
| Clams         | $5.87 \pm 0.48$ | $50.2 \pm 2.56$  | $11.9 \pm 0.82$ |
| Potatoes      | $4.66 \pm 0.15$ | $17.52 \pm 1.18$ |                 |
| Kelp          | $1.75 \pm 0.17$ | $41.1 \pm 2.84$  | $37.4 \pm 0.41$ |
| Water spinach | $10.7 \pm 0.19$ | $28.5 \pm 0.43$  | $1.31 \pm 0.31$ |

Table S2. The subcellular distribution of Cu, Zn, and As in raw food ingredients (%)

|               | Heat-stable<br>proteins<br>(HSP) | Heat-denatured<br>proteins<br>(HDP) | Organelle | Insoluble<br>fraction |
|---------------|----------------------------------|-------------------------------------|-----------|-----------------------|
| Cu            |                                  |                                     |           |                       |
| Pork          | 10 ± 1.2                         | 17 ± 1.3                            | 8.7 ± 1.2 | 64 ± 1.6              |
| Beef          | 8.3 ± 0.8                        | 16 ± 0.9                            | 10 ± 2.9  | 66 ± 1.9              |
| Chicken       | 8.6 ± 1.1                        | 15 ± 0.8                            | 5.4 ± 0.7 | 71 ± 2.2              |
| Prawns        | 7.2 ± 1.6                        | 16 ± 2.0                            | 3.5 ± 0.2 | 74 ± 1.9              |
| Squid         | 6.6 ± 1.3                        | 28 ± 1.7                            | 7.3 ± 1.8 | 58 ± 2.0              |
| Grass carp    | 4.4 ± 0.8                        | 29 ± 1.4                            | 17 ± 1.5  | 50 ± 3.3              |
| Sea bream     | 5.8 ± 0.7                        | 30 ± 2.7                            | 15 ± 0.6  | 49 ± 3.0              |
| Oysters       | 24 ± 3.7                         | 25 ± 3.6                            | 8.6 ± 0.8 | 42 ± 2.2              |
| Clams         | 23 ± 2.8                         | 9.8 ± 0.9                           | 10 ± 0.2  | 57 ± 2.0              |
| Potatoes      | 64 ± 5.7                         | 22 ± 5.3                            | 4.8 ± 0.3 | 9 ± 1.6               |
| Kelp          | 27 ± 2.2                         | 3.8 ± 1.0                           | 13 ± 0.5  | 57 ± 1.6              |
| Water spinach | 41 ± 4.9                         | 16 ± 4.5                            | 4.6 ± 0.2 | 39 ± 0.5              |
| Zn            |                                  |                                     |           |                       |
| Pork          | 5.6 ± 0.3                        | 38 ± 3.8                            | 3.0 ± 1.1 | 54 ± 3.3              |
| Beef          | 22 ± 4.0                         | 14 ± 4.0                            | 1.2 ± 0.1 | 63 ± 0.2              |
| Chicken       | 3.7 ± 0.5                        | 41 ± 0.1                            | 1.9 ± 0.1 | 53 ± 0.5              |
| Prawns        | 5.5 ± 1                          | 20 ± 1.8                            | 1.8 ± 0.1 | 72 ± 1.0              |
| Squid         | 11 ± 1.1                         | 29 ± 1.6                            | 4.6 ± 0.5 | 56 ± 1.9              |
| Grass carp    | 2.5 ± 0.3                        | 42 ± 1.1                            | 5.6 ± 1.1 | 50 ± 0.6              |
| Sea bream     | 2.6 ± 0.2                        | 46 ± 2.1                            | 5.5 ± 1.3 | 46 ± 0.7              |
| Oysters       | 17 ± 0.6                         | 40 ± 2.2                            | 8.5 ± 0.2 | 34 ± 1.9              |
| Clams         | 21 ± 2.7                         | 35 ± 2.0                            | 8.3 ± 0.8 | 36 ± 1.0              |
| Potatoes      | 52 ± 2.0                         | 41 ± 2.7                            | 2.6 ± 0.1 | 4.7 ± 1.2             |
| Kelp          | 27 ± 0.3                         | 16 ± 1.4                            | 12 ± 1.9  | 44 ± 3.0              |
| Water spinach | 18 ± 0.4                         | 53 ± 1.8                            | 4.2 ± 0.9 | 25 ± 0.8              |
| As            |                                  |                                     |           |                       |
| Prawns        | 63 ± 1.9                         | 3 ± 0.5                             | 3.7 ± 0.4 | 31 ± 1.2              |
| Squid         | 59 ± 1.6                         | 2.5 ± 1.1                           | 3.1 ± 0.2 | 36 ± 0.4              |
| Sea bream     | 71 ± 2.2                         | 4.4 ± 2.0                           | 3.2 ± 0.7 | 21 ± 1.3              |
| Oysters       | 51 ± 0.4                         | 2.1 ± 1.1                           | 12 ± 0.6  | 35 ± 1.7              |
| Clams         | 60 ± 3.0                         | 6.2 ± 2.8                           | 6.4 ± 0.8 | 27 ± 0.6              |
| Kelp          | 5.1 ± 0.8                        | 4.3 ± 1.4                           | 22 ± 1.4  | 68 ± 3.2              |
| Water spinach | 59 ± 8.2                         | 9.4 ± 8.8                           | 2.7 ± 0.3 | 29 ± 1.5              |

Table S3. The retention rate of Cu, Zn, and As in food ingredients (%)

|               | raw       | boiled   | steamed   | baked     | fried    |
|---------------|-----------|----------|-----------|-----------|----------|
| Cu            |           |          |           |           |          |
| Pork          | 100 ± 5.8 | 93 ± 4.7 | 104 ± 7.4 | 99 ± 8.6  | 80 ± 4.7 |
| Beef          | 100 ± 1.1 | 93 ± 2.0 | 104 ± 3.7 | 107 ± 12  | 82 ± 2.5 |
| Chicken       | 100 ± 4.4 | 89 ± 4.4 | 93 ± 4.9  | 82 ± 6.2  | 66 ± 7.6 |
| Prawns        | 100 ± 18  | 88 ± 7.9 | 104 ± 17  | 98 ± 9.3  | 80 ± 9.6 |
| Squid         | 100 ± 16  | 95 ± 11  | 113 ± 15  | 96 ± 17   | 76 ± 12  |
| Grass carp    | 100 ± 5.1 | 91 ± 17  | 97 ± 18   | 95 ± 21   | 93 ± 14  |
| Sea bream     | 100 ± 12  | 93 ± 16  | 112 ± 8.5 | 95 ± 9    | 90 ± 10  |
| Oysters       | 100 ± 19  | 95 ± 6.5 | 107 ± 18  | 93 ± 11   | 67 ± 14  |
| Clams         | 100 ± 8.1 | 96 ± 13  | 92 ± 5.6  | 98 ± 6.8  | 71 ± 6.2 |
| Potatoes      | 100 ± 3.2 | 84 ± 7.2 | 91 ± 4.9  | 104 ± 9.4 | 74 ± 5.7 |
| Kelp          | 100 ± 9.8 | 89 ± 3.8 | 105 ± 17  | 104 ± 18  | 60 ± 2.7 |
| Water spinach | 100 ± 1.8 | 85 ± 3.3 | 95 ± 5.4  | 100 ± 8.1 | 27 ± 0.7 |
| Average       | 100 ± 8.8 | 91 ± 8.7 | 101 ± 12  | 98 ± 12   | 72 ± 18  |
| Zn            |           |          |           |           |          |
| Pork          | 100 ± 0.8 | 92 ± 3.7 | 108 ± 2.8 | 100 ± 9.3 | 82 ± 3.3 |
| Beef          | 100 ± 5.6 | 95 ± 2.8 | 103 ± 3.8 | 98 ± 3.0  | 84 ± 3.8 |
| Chicken       | 100 ± 6.9 | 87 ± 11  | 105 ± 1.6 | 100 ± 12  | 82 ± 9.3 |
| Prawns        | 100 ± 2.3 | 94 ± 1.7 | 107 ± 6.1 | 101 ± 4.4 | 87 ± 6.1 |
| Squid         | 100 ± 9.0 | 96 ± 2.1 | 99 ± 3.2  | 94 ± 7.3  | 87 ± 9.5 |
| Grass carp    | 100 ± 8.2 | 83 ± 5.2 | 87 ± 22   | 92 ± 1.5  | 95 ± 3.6 |
| Sea bream     | 100 ± 7.6 | 93 ± 2.9 | 98 ± 16   | 87 ± 2.9  | 85 ± 4.3 |
| Oysters       | 100 ± 24  | 93 ± 11  | 103 ± 7.1 | 99 ± 17   | 69 ± 5.1 |
| Clams         | 100 ± 5.1 | 93 ± 7.0 | 100 ± 6.2 | 99 ± 1.9  | 70 ± 0.9 |
| Potatoes      | 100 ± 6.7 | 76 ± 15  | 108 ± 13  | 110 ± 9.2 | 76 ± 1.3 |
| Kelp          | 100 ± 6.9 | 80 ± 2.0 | 96 ± 8.1  | 87 ± 0.6  | 76 ± 4.0 |
| Water spinach | 100 ± 1.5 | 95 ± 2.9 | 104 ± 4.6 | 105 ± 10  | 30 ± 2.3 |
| Average       | 100 ± 7.5 | 90 ± 8.6 | 101 ± 9.9 | 97 ± 9.4  | 77 ± 17  |
| As            |           |          |           |           |          |
| Prawns        | 100 ± 0.4 | 63 ± 2.0 | 81 ± 5.0  | 95 ± 3.8  | 71 ± 9.2 |
| Squid         | 100 ± 3.4 | 44 ± 4.5 | 62 ± 3.0  | 87 ± 7.1  | 81 ± 5.7 |
| Sea bream     | 100 ± 2.5 | 52 ± 4.5 | 69 ± 2.7  | 74 ± 1.2  | 79 ± 8.3 |
| Oysters       | 100 ± 3.1 | 79 ± 5.1 | 76 ± 3    | 77 ± 3.3  | 71 ± 6.2 |
| Clams         | 100 ± 6.9 | 69 ± 11  | 93 ± 11   | 100 ± 1.3 | 71 ± 4.3 |
| Kelp          | 100 ± 1.1 | 88 ± 8.3 | 97 ± 5.8  | 95 ± 1.0  | 56 ± 1.0 |
| Water spinach | 100 ± 24  | 83 ± 6.6 | 89 ± 16   | 94 ± 27   | 26 ± 1.9 |
| Average       | 100 ± 8.0 | 68 ± 16  | 81 ± 14   | 89 ± 13   | 65 ± 19  |

Table S4. The bioaccessibility of Cu, Zn, and As in food ingredients (%)

|               | raw       | boiled    | steamed  | baked    | fried    |
|---------------|-----------|-----------|----------|----------|----------|
| Cu            |           |           |          |          |          |
| Pork          | 97 ± 9.0  | 36 ± 0.7  | 47 ± 3.9 | 60 ± 4.1 | 52 ± 3.4 |
| Beef          | 81 ± 3.2  | 27 ± 4.8  | 33 ± 1.7 | 38 ± 3.9 | 56 ± 2.9 |
| Chicken       | 85 ± 3.5  | 45 ± 3.5  | 47 ± 5.6 | 56 ± 4.6 | 54 ± 7.7 |
| Prawns        | 84 ± 4.3  | 52 ± 2.9  | 49 ± 7.8 | 58 ± 5.7 | 53 ± 4.8 |
| Squid         | 25 ± 4.2  | 20 ± 1.7  | 25 ± 3.9 | 26 ± 4.9 | 41 ± 2.8 |
| Grass carp    | 76 ± 9.6  | 50 ± 10   | 60 ± 20  | 52 ± 16  | 61 ± 9.9 |
| Sea bream     | 72 ± 4.3  | 54 ± 6.0  | 64 ± 11  | 62 ± 5.2 | 59 ± 4.4 |
| Oysters       | 93 ± 5.6  | 67 ± 3.5  | 69 ± 5.7 | 71 ± 9.0 | 74 ± 3.0 |
| Clams         | 75 ± 10   | 37 ± 5.2  | 36 ± 0.6 | 34 ± 2.0 | 59 ± 4.2 |
| Potatoes      | 89 ± 5.1  | 90 ± 5.1  | 90 ± 5.8 | 91 ± 7.2 | 87 ± 4.3 |
| Kelp          | 44 ± 1.9  | 34 ± 1.2  | 29 ± 1.2 | 26 ± 2.6 | 38 ± 1.4 |
| Water spinach | 88 ± 7.8  | 81 ± 4.1  | 84 ± 2.8 | 86 ± 5.1 | 94 ± 3.6 |
| Average       | 76 ± 21   | 49 ± 21   | 53 ± 22  | 55 ± 22  | 61 ± 17  |
| Zn            |           |           |          |          |          |
| Pork          | 82 ± 5.8  | 36 ± 7.2  | 27 ± 1.3 | 38 ± 0.6 | 51 ± 2.6 |
| Beef          | 61 ± 2.4  | 41 ± 4.8  | 42 ± 0.8 | 38 ± 2.4 | 45 ± 2.1 |
| Chicken       | 68 ± 11   | 34 ± 4.1  | 25 ± 3.7 | 29 ± 5.9 | 59 ± 6.3 |
| Prawns        | 66 ± 2.3  | 35 ± 2.6  | 35 ± 1.1 | 37 ± 4.2 | 46 ± 4.5 |
| Squid         | 72 ± 8.2  | 70 ± 4.8  | 64 ± 1.8 | 70 ± 6.0 | 62 ± 3.8 |
| Grass carp    | 91 ± 10   | 61 ± 25   | 72 ± 10  | 70 ± 10  | 64 ± 7.4 |
| Sea bream     | 104 ± 1.6 | 65 ± 9.6  | 87 ± 7.4 | 81 ± 5.3 | 70 ± 5.6 |
| Oysters       | 91 ± 11   | 62 ± 1.8  | 62 ± 4.2 | 67 ± 5.1 | 83 ± 3.1 |
| Clams         | 87 ± 5.0  | 73 ± 4.0  | 71 ± 2.6 | 73 ± 2.7 | 86 ± 7.2 |
| Potatoes      | 85 ± 5.7  | 76 ± 6.8  | 80 ± 8.5 | 82 ± 2.1 | 85 ± 7.6 |
| Kelp          | 69 ± 1.1  | 64 ± 9.0  | 59 ± 3.8 | 67 ± 3.5 | 64 ± 4.1 |
| Water spinach | 69 ± 5.0  | 59 ± 3.4  | 56 ± 2.2 | 68 ± 2.2 | 63 ± 3.0 |
| Average       | 79 ± 14   | 56 ± 17   | 57 ± 20  | 60 ± 19  | 65 ± 14  |
| As            |           |           |          |          |          |
| Prawns        | 78 ± 2.0  | 67 ± 5.3  | 65 ± 0.9 | 76 ± 4.1 | 79 ± 4.6 |
| Squid         | 89 ± 7.5  | 39 ± 3.5  | 56 ± 1.8 | 66 ± 3.3 | 40 ± 4.1 |
| Sea bream     | 79 ± 2.1  | 84 ± 3.6  | 82 ± 4.1 | 91 ± 5.0 | 72 ± 5.0 |
| Oysters       | 96 ± 1.4  | 77 ± 2.1  | 78 ± 3.0 | 93 ± 1.6 | 94 ± 6.4 |
| Clams         | 66 ± 3.7  | 55 ± 8.0  | 53 ± 5.1 | 55 ± 4.1 | 65 ± 3.6 |
| Kelp          | 14 ± 0.5  | 8.9 ± 0.5 | 17 ± 1.5 | 10 ± 1.4 | 24 ± 3.0 |
| Water spinach | 57 ± 1.5  | 55 ± 4.8  | 56 ± 4.8 | 54 ± 4.6 | 78 ± 9.9 |
| Average       | 77 ± 14   | 63 ± 16   | 65 ± 12  | 72 ± 16  | 71 ± 18  |

Table S5. The total bioaccessible fraction (TBF) of Cu, Zn, and As in food ingredients

|               | (%)       |           |          |           |          |
|---------------|-----------|-----------|----------|-----------|----------|
|               | raw       | boiled    | steamed  | baked     | fried    |
| Cu            |           |           |          |           |          |
| Pork          | 97 ± 3.3  | 33 ± 1.0  | 49 ± 2.1 | 60 ± 7.1  | 42 ± 2.3 |
| Beef          | 81 ± 3.4  | 25 ± 3.9  | 34 ± 2.8 | 40 ± 8.7  | 46 ± 1.0 |
| Chicken       | 85 ± 2.2  | 40 ± 2.5  | 44 ± 5.5 | 46 ± 1.5  | 36 ± 6.8 |
| Prawns        | 84 ± 15   | 46 ± 4.1  | 50 ± 2.9 | 57 ± 1.5  | 42 ± 2.1 |
| Squid         | 24 ± 2.0  | 19 ± 3.1  | 28 ± 3.7 | 24 ± 1.0  | 31 ± 2.6 |
| Grass carp    | 76 ± 8.8  | 47 ± 18   | 60 ± 27  | 47 ± 9.5  | 56 ± 8.0 |
| Sea bream     | 72 ± 10   | 50 ± 3.7  | 72 ± 16  | 59 ± 11   | 53 ± 3.7 |
| Oysters       | 92 ± 12   | 64 ± 1.8  | 75 ± 19  | 65 ± 1.2  | 50 ± 9.1 |
| Clams         | 76 ± 16   | 35 ± 4.5  | 33 ± 2.4 | 33 ± 3.3  | 42 ± 2.1 |
| Potatoes      | 89 ± 4.2  | 76 ± 9.5  | 82 ± 5.9 | 95 ± 11   | 64 ± 7.5 |
| Kelp          | 44 ± 2.5  | 30 ± 1.3  | 31 ± 6.1 | 26 ± 2.1  | 23 ± 0.9 |
| Water spinach | 88 ± 9.3  | 69 ± 5.4  | 80 ± 3.6 | 86 ± 2.3  | 25 ± 0.3 |
| Average       | 76 ± 22   | 44 ± 18   | 53 ± 22  | 53 ± 22   | 42 ± 13  |
| Zn            |           |           |          |           |          |
| Pork          | 82 ± 6.4  | 33 ± 7.0  | 29 ± 0.6 | 38 ± 4    | 42 ± 2.9 |
| Beef          | 61 ± 5.9  | 39 ± 4.3  | 43 ± 0.8 | 38 ± 3.4  | 38 ± 0.8 |
| Chicken       | 69 ± 13   | 30 ± 3.6  | 27 ± 4.1 | 29 ± 7.9  | 48 ± 7.7 |
| Prawns        | 66 ± 3.3  | 33 ± 1.8  | 38 ± 2.6 | 37 ± 3    | 40 ± 2.0 |
| Squid         | 72 ± 11   | 67 ± 5.5  | 64 ± 3.6 | 65 ± 1.8  | 53 ± 2.8 |
| Grass carp    | 91 ± 11   | 52 ± 23   | 63 ± 18  | 65 ± 9.6  | 61 ± 5.9 |
| Sea bream     | 104 ± 6.7 | 60 ± 9.8  | 85 ± 7.4 | 70 ± 5.7  | 60 ± 7.5 |
| Oysters       | 89 ± 13   | 58 ± 5.3  | 64 ± 8.7 | 66 ± 7.2  | 57 ± 4.1 |
| Clams         | 86 ± 1.3  | 68 ± 1.6  | 71 ± 2.0 | 73 ± 1.4  | 60 ± 5.8 |
| Potatoes      | 86 ± 11   | 57 ± 5.7  | 86 ± 7.7 | 90 ± 6.0  | 65 ± 6.0 |
| Kelp          | 69 ± 5.8  | 52 ± 6.6  | 56 ± 6.6 | 59 ± 2.6  | 49 ± 1.2 |
| Water spinach | 69 ± 6.0  | 56 ± 1.5  | 58 ± 4.9 | 71 ± 4.7  | 19 ± 1.1 |
| Average       | 79 ± 14   | 50 ± 15   | 57 ± 20  | 58 ± 19   | 49 ± 13  |
| As            |           |           |          |           |          |
| Prawns        | 78 ± 1.8  | 42 ± 2.3  | 52 ± 4   | 72 ± 6.2  | 57 ± 10  |
| Squid         | 89 ± 9.2  | 17 ± 0.3  | 35 ± 2.7 | 57 ± 2.7  | 32 ± 1.4 |
| Sea bream     | 79 ± 0.7  | 44 ± 2    | 57 ± 4.4 | 67 ± 4.7  | 57 ± 2.3 |
| Oysters       | 96 ± 4.3  | 60 ± 2.3  | 60 ± 2.4 | 71 ± 2.1  | 67 ± 9.9 |
| Clams         | 66 ± 8    | 38 ± 1.7  | 49 ± 1.9 | 55 ± 4.4  | 46 ± 0.7 |
| Kelp          | 14 ± 0.5  | 7.8 ± 0.5 | 16 ± 0.6 | 9.9 ± 1.4 | 13 ± 1.8 |
| Water spinach | 57 ± 14   | 46 ± 7.5  | 50 ± 13  | 50 ± 13   | 21 ± 4.1 |
| Average       | 77 ± 15   | 41 ± 14   | 50 ± 9.5 | 62 ± 10   | 47 ± 17  |

Table S6. The total bioaccessible fraction (TBF) of Cu, Zn, and As in food ingredients

|               | (µg g <sup>-1</sup> dry weight) |                           |                           |                           |                           |
|---------------|---------------------------------|---------------------------|---------------------------|---------------------------|---------------------------|
|               | raw                             | boiled                    | steamed                   | baked                     | fried                     |
| Cu            |                                 |                           |                           |                           |                           |
| Pork          | 1.18 ± 0.04 <sup>a</sup>        | 0.41 ± 0.01 <sup>b</sup>  | 0.59 ± 0.06 <sup>c</sup>  | 0.73 ± 0.05 <sup>d</sup>  | 0.51 ± 0.01 <sup>e</sup>  |
| Beef          | 2.74 ± 0.13 <sup>a</sup>        | 0.84 ± 0.13 <sup>b</sup>  | 1.14 ± 0.11 <sup>c</sup>  | 1.37 ± 0.29 <sup>cd</sup> | 1.55 ± 0.04 <sup>d</sup>  |
| Chicken       | 0.91 ± 0.05 <sup>a</sup>        | 0.43 ± 0.01 <sup>bc</sup> | 0.47 ± 0.04 <sup>b</sup>  | 0.49 ± 0.03 <sup>b</sup>  | 0.38 ± 0.06 <sup>c</sup>  |
| Prawns        | 6.38 ± 3.42 <sup>a</sup>        | 3.43 ± 1.47 <sup>bc</sup> | 3.64 ± 1.04 <sup>bc</sup> | 4.12 ± 1.33 <sup>b</sup>  | 3.07 ± 0.91 <sup>c</sup>  |
| Squid         | 0.92 ± 0.19 <sup>a</sup>        | 0.74 ± 0.22 <sup>b</sup>  | 1.05 ± 0.28 <sup>ac</sup> | 0.92 ± 0.17 <sup>a</sup>  | 1.18 ± 0.25 <sup>c</sup>  |
| Grass carp    | 1.00 ± 0.25 <sup>a</sup>        | 0.58 ± 0.10 <sup>a</sup>  | 0.82 ± 0.53 <sup>a</sup>  | 0.64 ± 0.28 <sup>a</sup>  | 0.75 ± 0.28 <sup>a</sup>  |
| Sea bream     | 1.03 ± 0.18 <sup>a</sup>        | 0.70 ± 0.03 <sup>b</sup>  | 1.03 ± 0.23 <sup>a</sup>  | 0.84 ± 0.18 <sup>ab</sup> | 0.76 ± 0.05 <sup>b</sup>  |
| Oysters       | 98.2 ± 41.2 <sup>a</sup>        | 66.5 ± 20.4 <sup>b</sup>  | 75.0 ± 11.9 <sup>ab</sup> | 68.1 ± 18.7 <sup>b</sup>  | 53.2 ± 24.0 <sup>c</sup>  |
| Clams         | 4.51 ± 1.30 <sup>a</sup>        | 2.07 ± 0.42 <sup>b</sup>  | 1.93 ± 0.09 <sup>b</sup>  | 1.93 ± 0.21 <sup>b</sup>  | 2.46 ± 0.11 <sup>b</sup>  |
| Potatoes      | 4.14 ± 0.23 <sup>a</sup>        | 3.55 ± 0.55 <sup>a</sup>  | 3.82 ± 0.22 <sup>a</sup>  | 4.43 ± 0.66 <sup>a</sup>  | 2.99 ± 0.37 <sup>b</sup>  |
| Kelp          | 0.77 ± 0.12 <sup>a</sup>        | 0.53 ± 0.07 <sup>b</sup>  | 0.54 ± 0.11 <sup>b</sup>  | 0.46 ± 0.07 <sup>bc</sup> | 0.40 ± 0.02 <sup>c</sup>  |
| Water spinach | 9.43 ± 1.16 <sup>a</sup>        | 7.32 ± 0.69 <sup>b</sup>  | 8.57 ± 0.53 <sup>ab</sup> | 9.13 ± 0.39 <sup>a</sup>  | 2.68 ± 0.01 <sup>c</sup>  |
| Zn            |                                 |                           |                           |                           |                           |
| Pork          | 41.3 ± 3.5 <sup>a</sup>         | 16.5 ± 3.5 <sup>bc</sup>  | 14.4 ± 0.2 <sup>c</sup>   | 18.9 ± 2.2 <sup>bc</sup>  | 21.2 ± 1.4 <sup>b</sup>   |
| Beef          | 117 ± 18 <sup>a</sup>           | 75.8 ± 12.2 <sup>b</sup>  | 83.3 ± 3.7 <sup>b</sup>   | 72.4 ± 9.6 <sup>b</sup>   | 72.9 ± 3.5 <sup>b</sup>   |
| Chicken       | 16.2 ± 4.0 <sup>a</sup>         | 6.98 ± 1.34 <sup>b</sup>  | 6.26 ± 1.40 <sup>b</sup>  | 6.89 ± 1.79 <sup>b</sup>  | 11.4 ± 2.3 <sup>c</sup>   |
| Prawns        | 41.1 ± 2.9 <sup>a</sup>         | 20.5 ± 0.8 <sup>b</sup>   | 23.6 ± 1.3 <sup>bc</sup>  | 23.3 ± 1.5 <sup>bc</sup>  | 25.0 ± 0.7 <sup>c</sup>   |
| Squid         | 50.8 ± 11.7 <sup>a</sup>        | 47.5 ± 8.3 <sup>a</sup>   | 44.5 ± 1.4 <sup>ab</sup>  | 45.7 ± 5.4 <sup>a</sup>   | 37.5 ± 5.0 <sup>b</sup>   |
| Grass carp    | 12.6 ± 2.0 <sup>a</sup>         | 7.23 ± 3.7 <sup>b</sup>   | 8.74 ± 3.09 <sup>b</sup>  | 8.79 ± 0.62 <sup>ab</sup> | 8.42 ± 1.50 <sup>b</sup>  |
| Sea bream     | 14.1 ± 2.0 <sup>a</sup>         | 8.19 ± 1.06 <sup>b</sup>  | 11.6 ± 1.9 <sup>c</sup>   | 9.62 ± 1.52 <sup>b</sup>  | 8.08 ± 0.51 <sup>b</sup>  |
| Oysters       | 570 ± 208 <sup>a</sup>          | 358 ± 66 <sup>b</sup>     | 396 ± 67 <sup>b</sup>     | 419 ± 143 <sup>b</sup>    | 360 ± 109 <sup>b</sup>    |
| Clams         | 43.3 ± 2.0 <sup>a</sup>         | 34.1 ± 2.1 <sup>b</sup>   | 35.5 ± 2.8 <sup>b</sup>   | 36.5 ± 2.5 <sup>b</sup>   | 30.1 ± 3.4 <sup>c</sup>   |
| Potatoes      | 15.1 ± 3.0 <sup>a</sup>         | 9.90 ± 1.07 <sup>b</sup>  | 15.1 ± 1.4 <sup>a</sup>   | 15.8 ± 1.5 <sup>a</sup>   | 11.3 ± 0.6 <sup>b</sup>   |
| Kelp          | 28.5 ± 4.4 <sup>a</sup>         | 21.2 ± 2.6 <sup>bc</sup>  | 23.1 ± 3.44 <sup>bc</sup> | 24.0 ± 1.0 <sup>b</sup>   | 20.1 ± 1.3 <sup>c</sup>   |
| Water spinach | 19.8 ± 2 <sup>a</sup>           | 15.9 ± 0.6 <sup>b</sup>   | 16.5 ± 1.5 <sup>b</sup>   | 20.1 ± 1.1 <sup>c</sup>   | 5.41 ± 0.34 <sup>d</sup>  |
| As            |                                 |                           |                           |                           |                           |
| Prawns        | 2.43 ± 0.05 <sup>a</sup>        | 1.32 ± 0.07 <sup>b</sup>  | 1.63 ± 0.12 <sup>bc</sup> | 2.25 ± 0.20 <sup>a</sup>  | 1.77 ± 0.31 <sup>c</sup>  |
| Squid         | 3.22 ± 0.33 <sup>a</sup>        | 0.61 ± 0.01 <sup>d</sup>  | 1.26 ± 0.10 <sup>c</sup>  | 2.07 ± 0.10 <sup>d</sup>  | 1.17 ± 0.05 <sup>c</sup>  |
| Sea bream     | 2.24 ± 0.02 <sup>a</sup>        | 1.25 ± 0.06 <sup>d</sup>  | 1.61 ± 0.12 <sup>c</sup>  | 1.91 ± 0.13 <sup>d</sup>  | 1.63 ± 0.06 <sup>c</sup>  |
| Oysters       | 11.5 ± 0.5 <sup>a</sup>         | 7.27 ± 0.27 <sup>b</sup>  | 7.17 ± 0.29 <sup>b</sup>  | 8.57 ± 0.25 <sup>c</sup>  | 8.08 ± 0.95 <sup>bc</sup> |
| Clams         | 7.97 ± 1.46 <sup>a</sup>        | 4.48 ± 0.21 <sup>b</sup>  | 5.85 ± 0.23 <sup>cd</sup> | 6.61 ± 0.53 <sup>c</sup>  | 5.49 ± 0.40 <sup>d</sup>  |
| Kelp          | 5.1 ± 0.2 <sup>a</sup>          | 2.93 ± 0.24 <sup>b</sup>  | 5.98 ± 0.29 <sup>c</sup>  | 3.72 ± 0.59 <sup>d</sup>  | 4.96 ± 0.71 <sup>a</sup>  |
| Water spinach | 0.78 ± 0.39 <sup>a</sup>        | 0.60 ± 0.14 <sup>a</sup>  | 0.68 ± 0.35 <sup>a</sup>  | 0.68 ± 0.33 <sup>a</sup>  | 0.27 ± 0.05 <sup>b</sup>  |

Different letters (a, b, c, d, e) represent significant differences between different treatment groups ( $p < 0.05$ )
